# Supplementary material
Source: PubMed Central journal article supplement (PMC2219309)
Supplement: endo_en.2007-1360_1.pdf [file endo_en.2007-1360_1.pdf]

| Mouse Number | shRNA transgenic | Crossed to IGHD II | Rescue     |
|--------------|------------------|--------------------|------------|
| 1a-20a       | -                |                    |            |
| 21a          | +                | No                 | -          |
| 22a, 23a     | -                |                    |            |
| <b>24a</b>   | +                | <b>Yes</b>         | <b>Yes</b> |
| <b>25a</b>   | +                | <b>Yes</b>         | <b>Yes</b> |
| 26a-28a      | -                |                    |            |
| 1b-5b        | -                |                    |            |
| <b>6b</b>    | +                | <b>Yes</b>         | <b>Yes</b> |
| 7b, 8b       | -                |                    |            |
| 9b           | +                |                    |            |
|              | (infertile)      |                    |            |
| 10b-18b      | -                |                    |            |
| 19b          | +                | No                 | -          |
| <b>20b</b>   | +                | <b>Yes</b>         | <b>Yes</b> |
| 21b-25b      | -                |                    |            |
| 26b          | +                | No                 | -          |
| <b>27b</b>   | +                | <b>Yes</b>         | <b>Yes</b> |
| 28b          | -                |                    |            |
| 29b          | +                | No                 | -          |
| 30b          | -                |                    |            |
