# Supplementary material
Source: PubMed Central journal article supplement (PMC2219309)
Supplement: endo_en.2007-1360_2.pdf [file endo_en.2007-1360_2.pdf]

| Genotype  | 95% Confidence interval (g) | Tukey-Kramer HSD | Shapiro-Wilk's Test |         |
|-----------|-----------------------------|------------------|---------------------|---------|
|           |                             |                  | W                   | p value |
| Wild type | 25.70±2.24                  | a                | 0.945401            | 0.7121  |
| shRNA-20  | 25.78±1.63                  | a                | 0.802426            | 0.1029  |
| Wild type | 27.80±1.49                  | a                | 0.945633            | 0.7137  |
| shRNA-25  | 28.04±1.84                  | a                | 0.841669            | 0.1257  |
