# Supplementary material
Source: PubMed Central journal article supplement (PMC2219309)
Supplement: endo_en.2007-1360_3.pdf [file endo_en.2007-1360_3.pdf]

| Genotype  | 95% Confidence interval (g) | Tukey-Kramer HSD | Shapiro-Wilk's Test |         |
|-----------|-----------------------------|------------------|---------------------|---------|
|           |                             |                  | W                   | p value |
| Wild type | 27.96±1.5                   | a                | 0.951720            | 0.7304  |
| IGHD II   | 13.96±0.99                  | b                | 0.984021            | 0.9806  |
| 20 Rescue | 27.38±2.50                  | a                | 0.995774            | 0.9986  |
| 25 Rescue | 23.83±0.65                  | a                | 0.840310            | 0.1905  |
