# Supplementary material
Source: PubMed Central journal article supplement (PMC2219309)
Supplement: endo_en.2007-1360_4.pdf [file endo_en.2007-1360_4.pdf]

| Genotype  | 95% Confidence interval (ng/ml) | Tukey-Kramer HSD | Shapiro-Wilk's Test |         |
|-----------|---------------------------------|------------------|---------------------|---------|
|           |                                 |                  | W                   | p value |
| Wild type | 471.8±49.1                      | a                | 0.932145            | 0.4967  |
| IGHD II   | 45.6±36.0                       | b                | 0.947342            | 0.5578  |
| 20 Rescue | 412.0±127.0                     | a                | 0.804221            | 0.1246  |
| 25 Rescue | 338.9±167.0                     | a                | 0.905374            | 0.4028  |
| Wild type | 470.0±138.4                     | a                | 0.979934            | 0.7285  |
| IGHD II   | 50.0±34.1                       | b                | 0.930937            | 0.4921  |
| 20 Rescue | 405.4±65.6                      | a                | 0.968142            | 0.6573  |
| 25 Rescue | 396.0±121.8                     | a                | 0.866832            | 0.2866  |

### Microscopy equipment and settings

Fluorescent immunohistochemistry images were acquired with a Zeiss LSM510 Meta Laser Scanning microscope (Fig. 3c) with the following settings: 8bit multitrack scan mode, pixel time 1.60µs and with Objective Plan Neofluar 40x/1.3 OIL DIC, filter Ch3: LP 560. The resolution was 512x512 and wavelength 543nm, 28%. The stacks were acquired with LSM510 software and the z-projections were made with NIH Image J within which the contrast was equally adjusted. The images were orientated in Adobe Photoshop.
