# Supplementary material
Source: PubMed Central journal article supplement (PMC2219309)

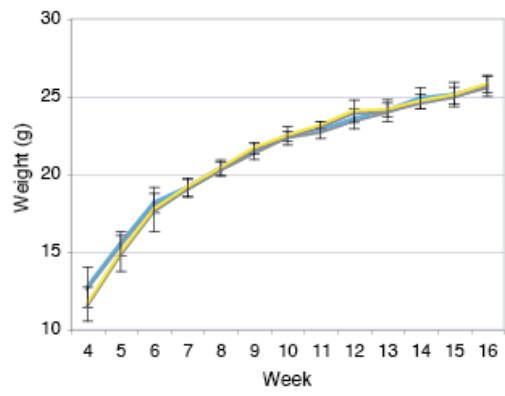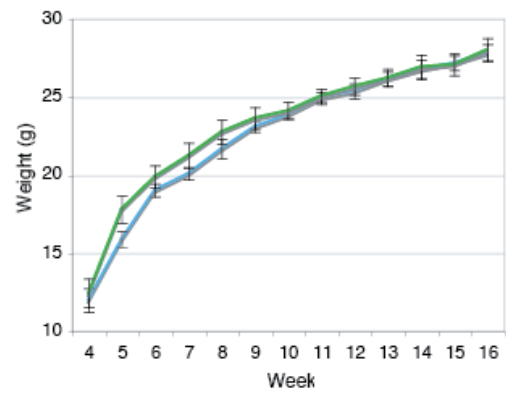

Shariat *et al.*  
Supplemental Figure 1

Supplement: endo_en.2007-1360_5.pdf [file endo_en.2007-1360_5.pdf]

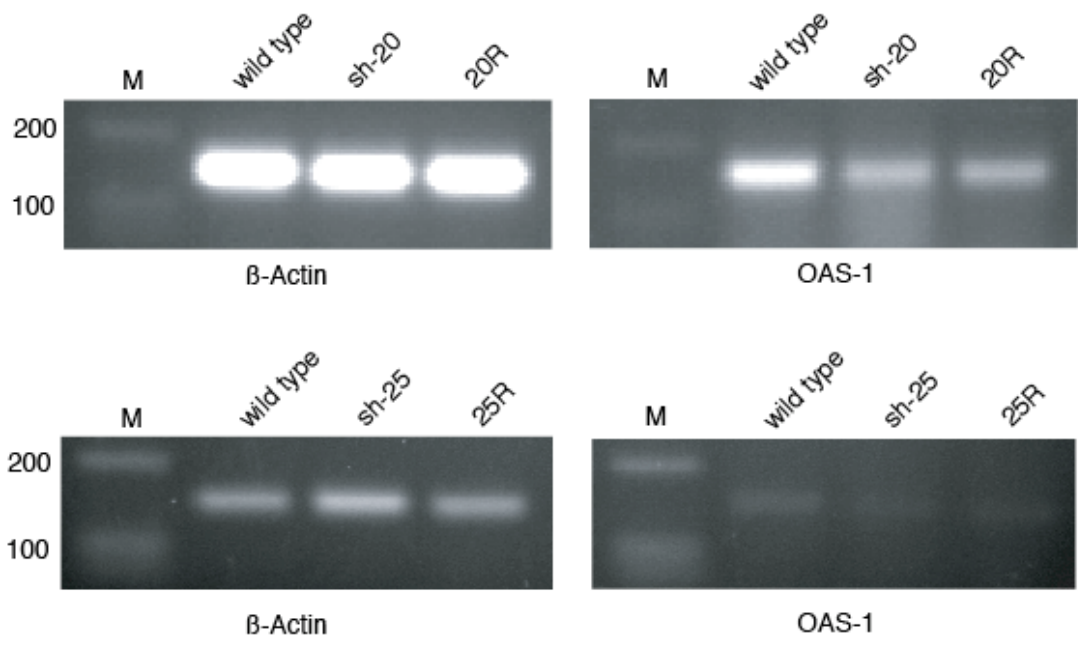

Shariat *et al.*  
Supplemental Figure 2

Supplement: endo_en.2007-1360_6.pdf [file endo_en.2007-1360_6.pdf]

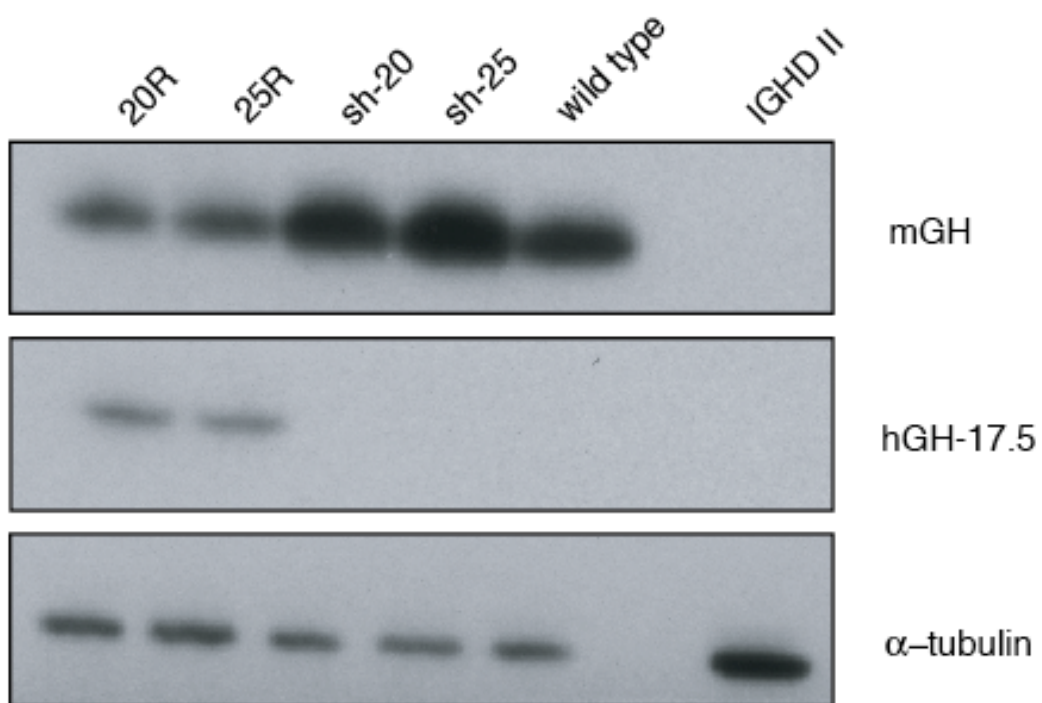

Shariat *et al.*  
Supplemental Figure 3

Supplement: endo_en.2007-1360_7.pdf [file endo_en.2007-1360_7.pdf]
